# Supplementary material for: Surface formation, preservation, and history of low-porosity crusts at the WAIS Divide site, West Antarctica
Source: Copernicus journal article supplement (doi:10.5194/tc-2016-155), 2016-06-29
Supplement: Supplementary file 1 [file tc-2016-155-supplement.pdf]

## Supplemental Information for

### Surface formation, preservation, and history of low-porosity crusts at the WAIS Divide site, West Antarctica.

John M. Fegyveresi<sup>1,2</sup>, Richard B. Alley<sup>2</sup>, Atsuhiko Muto<sup>3</sup>, Anaïs J. Orsi<sup>4</sup>,  
Matthew K. Spencer<sup>5</sup>

<sup>1</sup>Terrestrial and Cryospheric Sciences Branch, U.S. Cold Regions Research and Engineering Laboratory (CRREL), Hanover, NH, 03755, USA.

<sup>2</sup>Dept. of Geosciences, and Earth and Environmental Systems Institute, Pennsylvania State University, University Park, PA, 16802, USA.

<sup>3</sup>Dept. of Earth and Environmental Science, College of Science and Technology, Temple University, Philadelphia, PA, 19122, USA.

<sup>4</sup>Laboratoire des Sciences du Climat et de l'Environnement, LSCE/IPSL, CEA-CNRS-UVSQ, Université Paris-Saclay, F-91191, Gif-sur-Yvette, France.

<sup>5</sup>School of Physical Sciences, Lake Superior State University, Sault Sainte Marie, MI, 49783, USA.

*Correspondence to:*

J. M. Fegyveresi ([fegy.john@gmail.com](mailto:fegy.john@gmail.com); [john.m.fegyveresi@usace.army.mil](mailto:john.m.fegyveresi@usace.army.mil))

#### Contents of this file

Figures S1 to S6

Tables S1 to S3

Equation S1

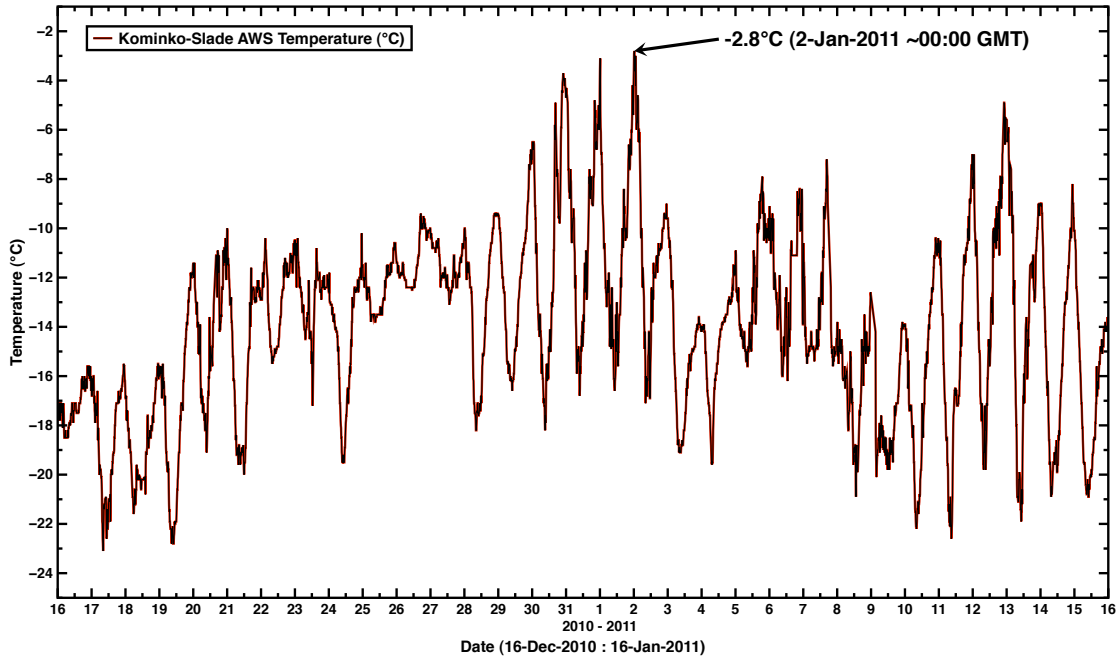

**Figure S1:** Automated weather station (Kominko-Slade) temperature data for WAIS Divide measured during the 2010-11 season. Temperature data are shown for the peak summertime period of Dec 16<sup>th</sup> – Jan 15. The peak of -2.8°C on Jan 2<sup>nd</sup> was the highest observed during our study interval (see also Fig. 6).

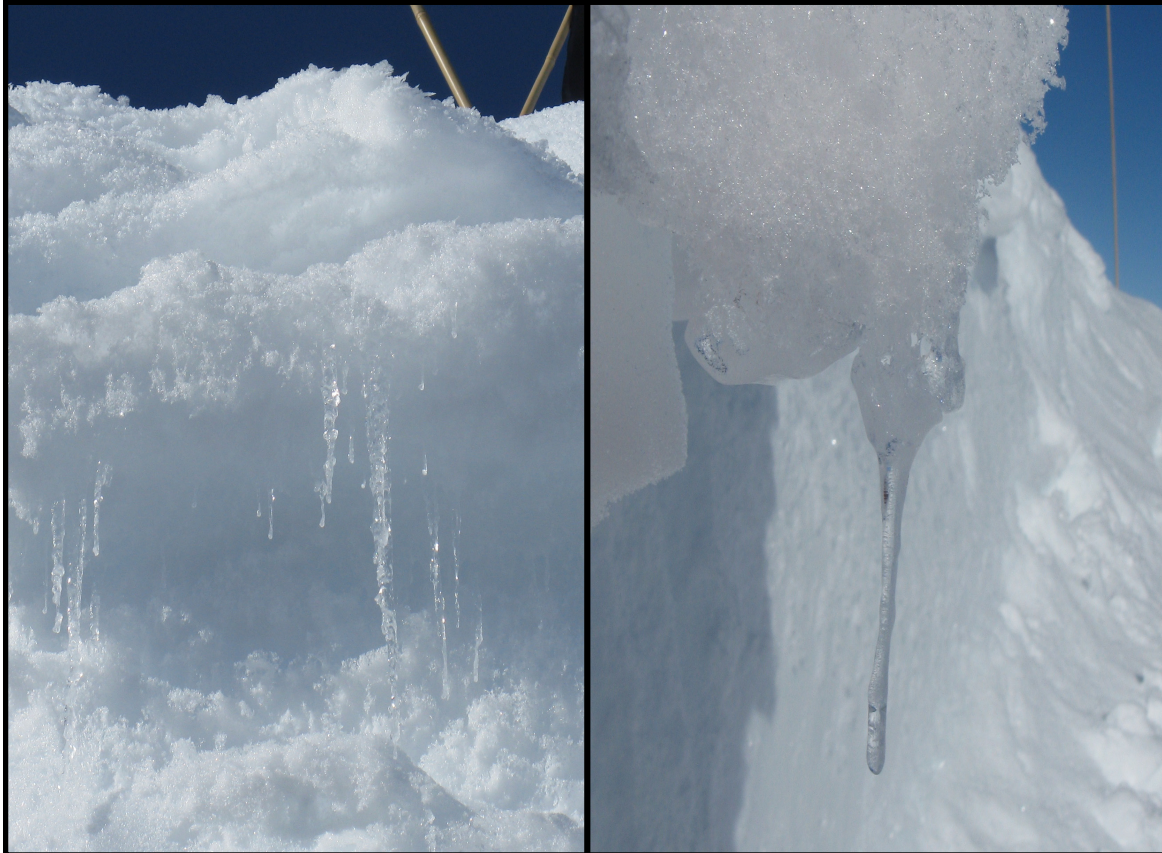

**Figure S2:** Photographs showing melt on disturbed, steep surfaces near the ice-core drilling facility during the 2-Jan-2011 extreme warm episode at WAIS Divide. Limited melting may have occurred beneath nearly horizontal, undisturbed surfaces away from the station.

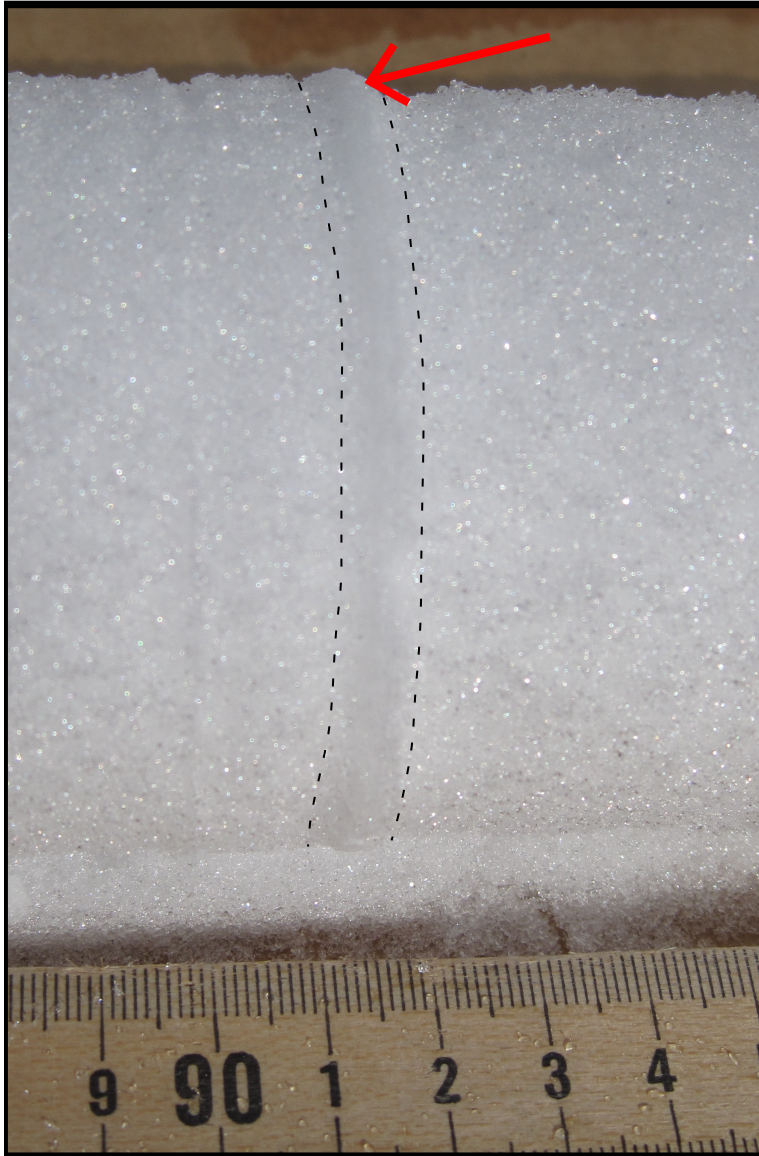

**Figure S3:** A 5+ mm crust or refrozen melt layer in a shallow firn core drilled during the 2011-12 WAIS Divide field season. Based upon its depth below the surface (~91 cm) and known accumulation rates for the area, this crust developed during the peak of the previous summer season (2010-2011).

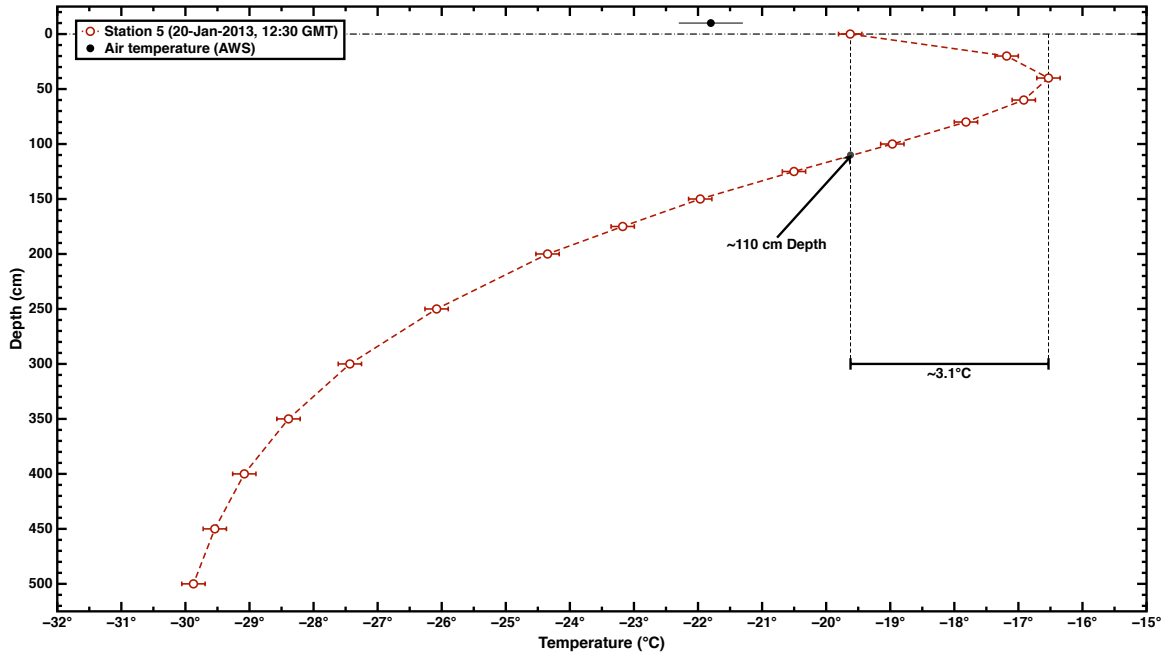

**Figure S4:** Firn-temperature data at station 5 at 12:30 GMT on 20-Jan-2013, when the largest subsurface temperature inversion was observed from the 2012-13 season (surface 3.1°C colder than the subsurface temperature maximum at 40 cm depth, with the surface approximately the same temperature as 110 cm). Air temperature recorded at the AWS (Kominko-Slade) was ~5°C colder than the subsurface temperature maximum.

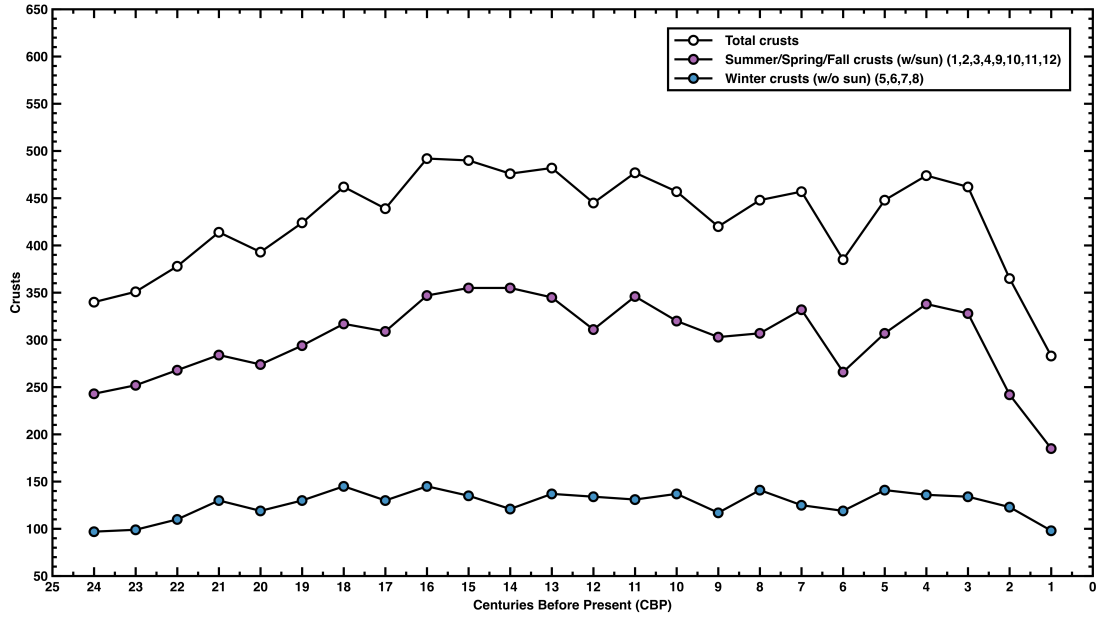

**Figure S5:** Crusts per century, for the 4-month “dark winter” (May-Aug), 8-month “summer/fall/spring” (Sep-Apr), and total. The larger changes in sunlight and total histories suggest a possible role for insolation. Crusts were bracketed 24 one-hundred-year bins starting with the most current year of 2007 (i.e. 2007-1907, 1907-1807, etc).

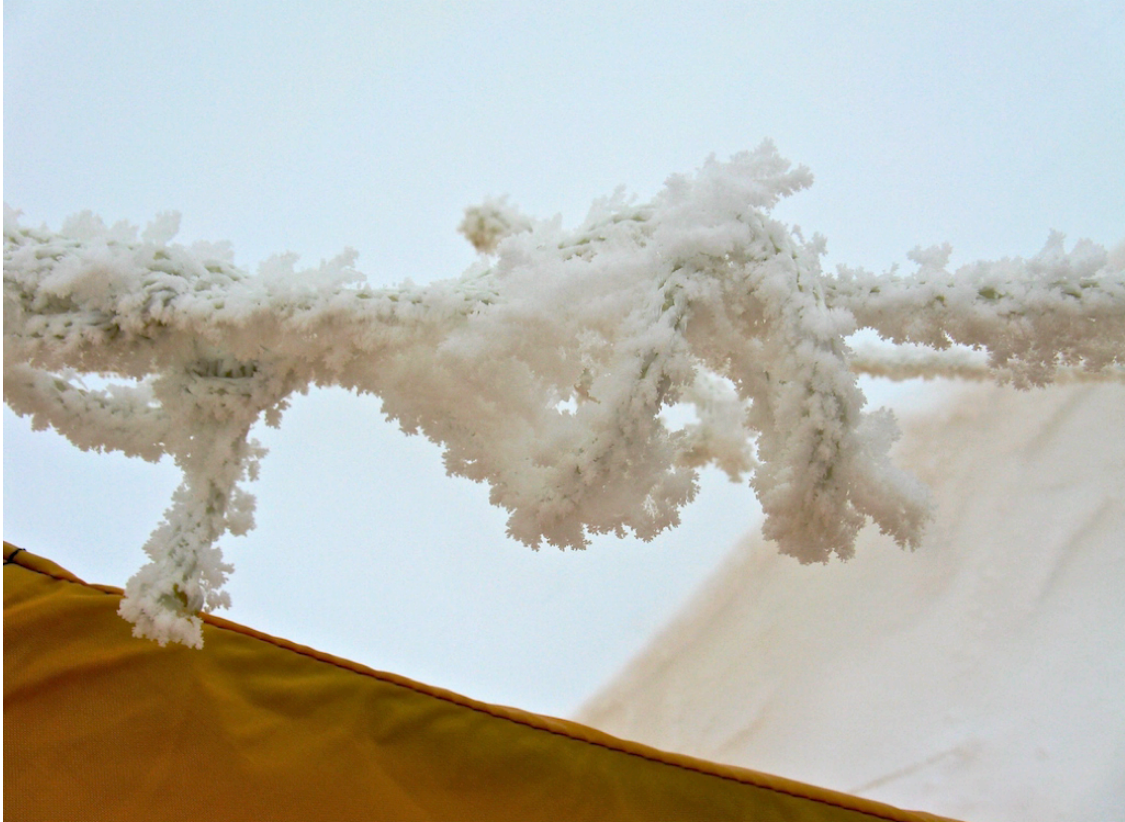

**Figure S6:** Faceted hoar growth on tent guylines that occurred during a heavy fog episode between Dec 30-31, 2009, at WAIS Divide (see also Fig. 5).

**Table S1:** Kominko-Slade (AWS) published errors.

| Sensor         | Resolution  | Accuracy      |
|----------------|-------------|---------------|
| Temperature    | 0.125°C     | ± 0.3         |
| Humidity       | 1.0%        | ± 5.0%        |
| Wind Speed     | 0.20 m/s    | ± 0.5 m/s     |
| Wind Direction | 1.5 Degrees | ± 3.0 Degrees |

**Table S2:** PRD string installation details and notes.

| Station ID         | Dist. from Station 1 | Date Installed | Latitude    | Longitude    |
|--------------------|----------------------|----------------|-------------|--------------|
| Station 1 (Origin) | 0 m                  | 15-Dec-2012    | -79.463894° | -112.110625° |
| Station 2          | 10 m                 | 15-Dec-2012    | -79.463804° | -112.110640° |
| Station 3          | 100 m                | 19-Dec-2012    | -79.463004° | -112.111204° |
| Station 4          | 1000 m               | 22-Dec-2012    | -79.455013° | -112.120247° |
| Station 5          | 2000 m               | 25-Dec-2012    | -79.446509° | -112.137542° |
| Kominko-Slade AWS  | -50 m                | 01-Dec-2008    | -79.466000° | -112.106000° |

**Table S3:** PRD constants (RTD, HEL-700 Series).

| Variable                                       | 1 <sup>st</sup> Level  | 2 <sup>nd</sup> Level    |
|------------------------------------------------|------------------------|--------------------------|
| Alpha ( $\alpha$ ) ( $^{\circ}\text{C}^{-1}$ ) | $0.00375 \pm 0.000029$ | $0.003850 \pm 0.000010$  |
| Delta ( $\delta$ ) ( $^{\circ}\text{C}$ )      | $1.605 \pm 0.009$      | $1.4999 \pm 0.007$       |
| Beta ( $\beta$ ) ( $^{\circ}\text{C}$ )        | 0.16                   | 0.10863                  |
| A ( $^{\circ}\text{C}^{-1}$ )                  | $3.81 \times 10^{-3}$  | $3.908 \times 10^{-3}$   |
| B ( $^{\circ}\text{C}^{-2}$ )                  | $-6.02 \times 10^{-7}$ | $-5.775 \times 10^{-7}$  |
| C ( $^{\circ}\text{C}^{-4}$ )                  | $-6.0 \times 10^{-12}$ | $-4.183 \times 10^{-12}$ |

**HEL-700 PRD Functional Behavior and and Constants**

**Equation S1:** 
$$R_T = R_0(1 + AT + BT^2 - 100CT^3 + CT^4)$$

Where,

$R_T$  = Resistance ( $\Omega$ ) at Temperature T ( $^{\circ}\text{C}$ )

$R_0$  = Resistance ( $\Omega$ ) at  $0^{\circ}\text{C}$

T = Temperature in  $^{\circ}\text{C}$

A =  $\alpha + \alpha \delta$

B =  $-\alpha \delta$

$C_{T<0}$  =  $-\alpha \beta$
